## 1           **Regulation of touch dependant *de novo* root regeneration in Arabidopsis**

2   Anju Pallipurath Shanmukhan<sup>1†</sup>, Mabel Maria Mathew<sup>1†</sup>, Mohammed Aiyaz<sup>1†</sup>, Abdul  
3   Kareem <sup>2</sup>, Dhanya Radhakrishnan<sup>1</sup>, Kalika Prasad<sup>1\*</sup>

4   <sup>1</sup> School of Biology, Indian Institute of Science Education and Research,  
5   Thiruvananthapuram, Kerala 695551, India.

6   <sup>2</sup> Present Address: School of Life and Environmental Sciences, The University of Sydney,  
7   NSW, Australia.

8   †Anju Pallipurath Shanmukhan, Mabel Maria Mathew and Mohammed Aiyaz contributed  
9   equally to this work

10   \*Correspondence: kalika@iisertvm.ac.in

### 11   **ORCID ID:**

12   A.K.: 0000-0002-0976-8652

13   K.P.: 0000-0001-8666-856X

### 14   **Abstract**

15   The versatile regeneration capability of leaves enable even a detached Arabidopsis leaf to  
16   yield two kinds of regenerative responses namely, wound healing at the cut end in form of  
17   callus formation or *de novo* root regeneration (DNRR). Using various experimental  
18   approaches, we show that the factor favouring DNRR over callus formation seems to be a  
19   mechanical cue, possibly touch, at the cut end of the detached leaf. Here, we show that the  
20   forced expression of a PLETHORA transcription factor can bypass the need for touch to  
21   initiate DNRR. Our findings provide a genetic frame-work for touch dependant DNRR and  
22   suggest that a core PLT transcription regulatory module acts in response to mechano- sensing  
23   stimuli.

24

25 Among several of the plant's lateral organs, leaves show highly versatile yet efficient  
26 regenerative responses. Regeneration in leaves may be natural, mechanical injury-induced, or  
27 tissue culture-mediated. In natural regeneration, an entire plant can regenerate from the leaf  
28 without hormonal supplements, for example various *Kalanchoe* species (Smith, Figueiredo  
29 and Van Wyk, 2019). In tissue culture-mediated regeneration, small leaf explants can give  
30 rise to entire shoot and/root system via an intermediary callus stage, but in the presence of  
31 hormonal supplements. Apart from these, the incised mid-vein of an undetached growing leaf  
32 and the cut end of a detached leaf exhibit regenerative responses, both of which fall under  
33 mechanical injury-induced regeneration. Although the mid-vein regeneration in growing  
34 leaves was investigated only recently, mechanical injury-induced regenerative responses at  
35 cut end of detached leaf has been studied for several years now (Chen *et al.*, 2014; Bustillo-  
36 Avendaño *et al.*, 2018; Xu, 2018; Radhakrishnan *et al.*, 2020). Adventitious roots arise from  
37 the cut site of the detached leaf, be it the base of leaf blade or the petiole via the process of *de*  
38 *novo* root regeneration (DNRR) (Chen *et al.*, 2014; Bustillo-Avendaño *et al.*, 2018). This  
39 ability of part of a tissue to give rise to an organ, whose identity is different from its parent  
40 tissue is rather intriguing. However, DNRR is not the only response observed at the cut end;  
41 wound healing in the form of callus formation is seen at the cut end of leaves that do not  
42 undergo DNRR. With the previously available data, it is unclear if the decision to make  
43 callus or DNRR is random or if any external inductive cues favour one phenomenon over the  
44 other. It is therefore imperative that we investigate this differential regenerative response to  
45 the same injury in the same organ.

46 We repeated the previously established DNRR assay using whole leaves with petioles  
47 (Bustillo-Avendaño *et al.*, 2018). When the leaves were placed abaxial-side down with the  
48 cut end of petiole touching the surface of the hormone free-solid Murashige and Skoog (MS)-  
49 Agar medium (referred to as MS-Agar media hereafter), we observed DNRR which is

50 consistent with the previous studies (Fig. 1, A,A',B and B')(Bustillo-Avendaño *et al.*, 2018)).

51 In our hand, the success rate of DNRR was only 30% and the remaining 70% of the leaves

52 showed neither DNRR nor callus formation(n=62) (Fig 1B'). However, when the leaves were

53 placed adaxial-side down with the petiole in the air and not touching the surface of media,

54 DNRR failed to occur in all the samples, but callus formation was observed at the cut end in

55 62% (n=50) of the samples (Fig. 1, C,C',D and D'). At a glance, three factors appear to be

56 different between the two cases: (i) nutrient availability at cut end (minimal MS and sucrose),

57 (ii) the orientation of the leaf on the MS-Agar media (adaxial/abaxial), and (iii) physical

58 touch of the cut end to the solid agar surface. Upon closer examination, the factor that

59 separates the two explants and presumably leading to the distinct regenerative responses

60 seems to be, touch. The explants that produced DNRR had its cut end touching the surface of

61 the MS-Agar media while those explants that had only callus formation were devoid of touch.

62 To prevent absorption of nutrients by the cut end from interfering with this observation, we

63 first carried out a simple split plate experiment where the top half of the plate contains MS-

64 Agar media, while the bottom half contains nutrient-free solid agar media (referred to as

65 agar-only media hereafter). The leaves were placed abaxial side down, such that the top half

66 of the leaf touches the media with nutrients and the bottom half with the petiole touches the

67 nutrient-free media (Fig. 1E). Since detached leaves on agar-only media showed yellowing

68 and withered away (Fig. S1A), we allowed the top half of leaf to touch the MS-agar media to

69 allow minimal nutrient transport for its sustenance and growth. Interestingly, 20.78% (n=154)

70 of leaf explants produced DNRR from the cut end that touched the agar-only media (Fig. 1F),

71 while the remaining leaf explants produced neither DNRR nor callus formation. Secondly, to

72 examine if the orientation of the leaf on the media plays a role, we placed the leaf adaxial

73 side down on an MS-Agar media while gently pressing down the leaf ensuring that the cut

74 end touches the media (Fig. 1G). We noticed that 34.2 % (n=38) of leaf explants exhibited

75 DNRR (Fig. 1H). Thirdly, we designed an experiment combining the first and second  
76 experiments, where the detached leaf was placed adaxial-side down on the half MS-Agar  
77 media, with its petiole being sandwiched between a parafilm strip and a block of agar-only  
78 media(Fig. 1I). The experimental set up ensures that the leaf is oriented adaxial-side down,  
79 devoid of nutrients at cut end and that the cut end is in touch with a nutrient-free agar block.  
80 We noticed that 17.86% (n=56) of leaf explants exhibited DNRR (Fig. 1J). Collectively, the  
81 results were in agreement with our hypothesis, that touch is the major factor distinguishing  
82 the two regenerative responses at the cut end of a detached leaf namely, DNRR from callus  
83 formation.

84 We then explored the genetics underlying this touch-dependant DNRR. Due to their  
85 indispensable and established role in tissue culture and injury-induced regeneration in  
86 Arabidopsis, *PLETHORA 3 (PLT3)*, *PLT5*, and *PLT7* were our first choice for investigation  
87 (Fig. 2, A-H and Fig. S1, B-O). Upon examining the expression pattern of *PLT7* using  
88 *WT/PLT7::PLT7-YFP* we found that the several cells near the cut expressed *PLT7-YFP*, at a  
89 low intensity by 24 hour when the cut end continuously touched the MS-Agar media; by  
90 48hours the YFP expression became more prominent (Fig. 2, A-D). However, when the cut  
91 end failed to touch the MS-Agar media, only few cells at the cut end expressed *PLT7-YFP*  
92 and at very low intensity by 24 hours, and by 48hours the YFP expression still remained faint  
93 and confined to very few cells (Fig. 2, E-H). It should be noted that all the leaf explants were  
94 cultured on hormone-free solid MS-agar media hereafter. Leaf explants from *plt3,5,7* mutant  
95 failed to yield DNRR despite the cut end of the petiole being in contact with the solid MS-  
96 Agar media, while over-expression(OE) of *PLT7 (WT/35S::PLT7-GR)* in Wild type  
97 background induced excessive DNRR (Fig. 2, I and J, Fig. S1, P and Q). Surprisingly, *PLT7*-  
98 OE also induced DNRR at a frequency of 52.2% (n=46) even when the cut end does not  
99 touch the media (Fig. 2, K and L). Thus, *PLT7*-OE seems to over-ride the need for touch

100 suggesting that PLT7 is necessary and sufficient to induce DNRR. Until now, PLT3,5,7 has  
101 been known to act through two different transcriptional regulatory modules during  
102 regeneration: (i) a two-step mechanism in which PLT3,5,7 independently activates PLT1,2  
103 and CUC2 sequentially for tissue culture-induced *de novo* shoot regeneration, and (ii) a PLT-  
104 CUC2 regulatory axis which acts in a coherent feed-forward loop to upregulate local auxin  
105 biosynthesis gene YUCCA4 during mechanical injury-induced vein regeneration in an  
106 undetached growing leaf (Kareem *et al.*, 2015; Radhakrishnan *et al.*, 2020). We probed, if  
107 either of the two regulatory modules could plausibly act during DNRR at the cut end. Live  
108 imaging using fluorescent reporter lines showed that PLT1 and PLT2 upregulated their  
109 expression during DNRR (Fig. S2A,A',C and C'). Additionally, expression of CUC2 was  
110 also observed, albeit rarely and at low level (Fig. S2, E and E').

111 Unlike in Wildtype (WT), PLT1, PLT2 as well as CUC2 remain undetectable in the cut ends  
112 of *plt3,5,7* mutant leaf explants (Fig. S2, B,B',D,D',F,F'). *plt3,5,7* mutants are defective in  
113 lateral root (LR) outgrowth. However, reconstitution of PLT1 in *plt3,5,7* mutant  
114 (*plt3,5,7/PLT7::PLT1-YFP*) rescued the root regeneration when petiole touches the medium,  
115 while reconstitution of CUC2 in *plt3,5,7* mutant (*plt3,5,7/PLT5::CUC2-YFP*) failed to do so  
116 (Fig. S3). Thus, PLT3,5,7-CUC2 regulatory module seems to be dispensable while, PLT3,5,7  
117 mediated activation of PLT1 appears to control DNRR in response to touch at the cut end.  
118 Very few of the *plt3,5,7* mutant leaf explants showed DNRR upon PLT1 reconstitution as  
119 opposed to the DNRR in 30% WT explants suggesting a partial recovery (Fig S3). Here, the  
120 low DNRR frequency is in contrast to the complete rescue of LR out-growth in *plt3,5,7*  
121 mutant samples reconstituted with PLT1 (Du and Scheres, 2017). Moreover, reconstitution of  
122 only PLT1 and not other root stem cell regulators such as WOX5 could trigger DNRR (Fig  
123 S3). Taken together, our results suggest that PLT mediated touch-dependant DNRR follows a  
124 mechanism distinct from that of PLT mediated regulation of LR outgrowth. PLT3,5,7

125 regulated DNRR likely requires additional root stem cell regulators, and this notion is in line  
126 with the previous reports that the cumulative loss of function of PLT1, PLT2 and SHR  
127 severely impair DNRR (Bustillo-Avenidaño *et al.*, 2018). It is plausible that, in addition to root  
128 stem cell regulators there are additional downstream targets which are activated by PLT3,5,7  
129 in response to mechano-sensitive cues (Fig. 2M).

130 Recently, it was shown that regeneration of specific cell types in root was influenced by  
131 osmotic pressure, suggesting that mechanical signalling pathways can be instrumental in  
132 regeneration (Hoermayer *et al.*, 2020). Therefore, it is possible that mechanical signals can  
133 instruct DNRR. Mechanical signal transduction can be triggered when the mechano-receptors  
134 on cells perceive stimuli such as gravity, wind, turgor pressure and in this case, touch. At  
135 present, it is likely that the touch induced mechano-signal transduction activate the regulatory  
136 module for fate switch from leaf to root rather indirectly. Here, we show that touch-  
137 dependant DNRR from detached leaf acts atleast in part through the root stem cell regulators  
138 PLT3,5,7 and PLT1 (Fig. 2M). It will be interesting to unravel how mechano-sensing impacts  
139 a PLT-regulated genetic frame-work in the event of DNRR from a detached leaf.

---

#### 140 **Acknowledgements & Funding**

141 K.P. acknowledges Department of Biotechnology (DBT), Government of India [grant  
142 BT/PR12394/AGIII/103/891/2014] and Department of Science and Technology, Science and  
143 Engineering Research Board (DST-SERB), Government of India [grant  
144 EMR/2017/002503/PS] for funding and also acknowledges the Indian Institute of Science  
145 Education and Research Thiruvananthapuram (IISER-TVM) for infrastructure facilities.  
146 A.P.S. is a recipient of Council of Scientific and Industrial Research (CSIR) fellowship. D.R.  
147 and M.M.M acknowledge University Grants Commission (UGC) fellowship. A.K. was  
148 recipient of Indian Institute of Science Education and Research-Thiruvananthapuram



149 fellowship. M.A. acknowledges Department of Biotechnology (DBT), Ministry of Science  
 150 and Technology, Government of India for the DBT-Post Doctoral Fellowship (DBT-RA  
 151 Program).

152 **Figures and legends**

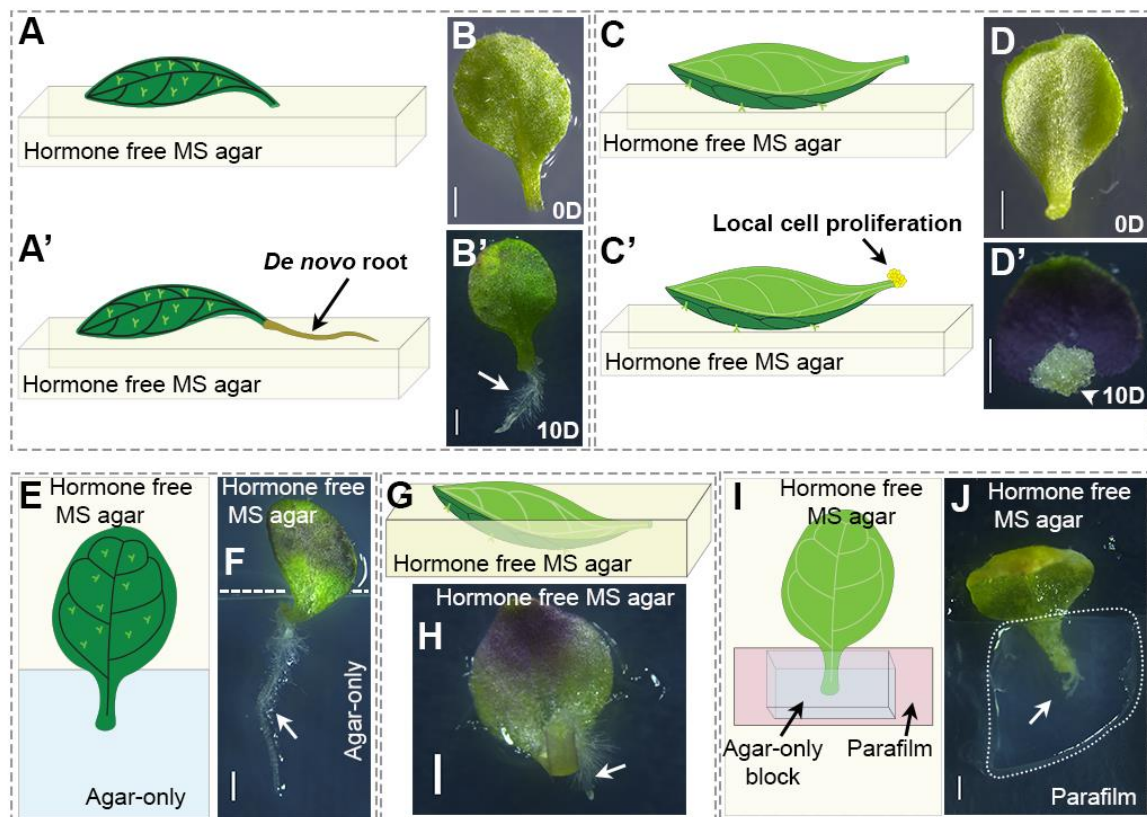

153

154 **Figure 1: Wound healing response and touch-dependant de novo regeneration at the cut**  
 155 **end of a detached leaf (A-I):** (A,A') A detached leaf when placed abaxial side down on the  
 156 hormone-free solid MS-Agar media (referred as MS-Agar media hereafter) results in the  
 157 formation of *de novo* root. (B,B')The stereo-microscopic images of the detached leaf placed  
 158 abaxial side down that regenerated *de novo* roots. (C,C')A detached leaf when placed adaxial  
 159 side down on the MS-Agar media results in the formation of *de novo* root. (D,D')The stereo-  
 160 micrographs of the detached leaf placed adaxial side down that regenerated *de novo* roots. (E)  
 161 Schematic depicting a “split-plate” where top half of MS-Agar medium is insulated from  
 162 hormone-free solid agar-only medium (referred as Agar-only medium hereafter). The leaf is  
 163 placed abaxial side down with its distal end touching the MS-Agar medium and its cut end  
 164 touching the Agar-only medium. (F) Stereo-micrographs of the leaf showing DNRR on the

165 split plate. (G) Schematic showing the detached leaf being pressed into the media with its  
166 adaxial side down. (H) Stereo-micrograph of the leaf showing DNRR after being pressed into  
167 the medium. (I) Schematic illustrating the experimental set up where the cut end touches  
168 Agar-only media but insulated from MS-Agar media. Here, the detached leaf is placed  
169 abaxial side down on MS-Agar medium, and the cut end is sandwiched between a thin  
170 parafilm strip and an Agar-only block. (J) Stereo micrograph of leaf showing DNRR after the  
171 cut end being sandwiched between parafilm and Agar-only block. The black and white  
172 arrows indicate *de novo* regenerated root. Scale bars represent 1mm.



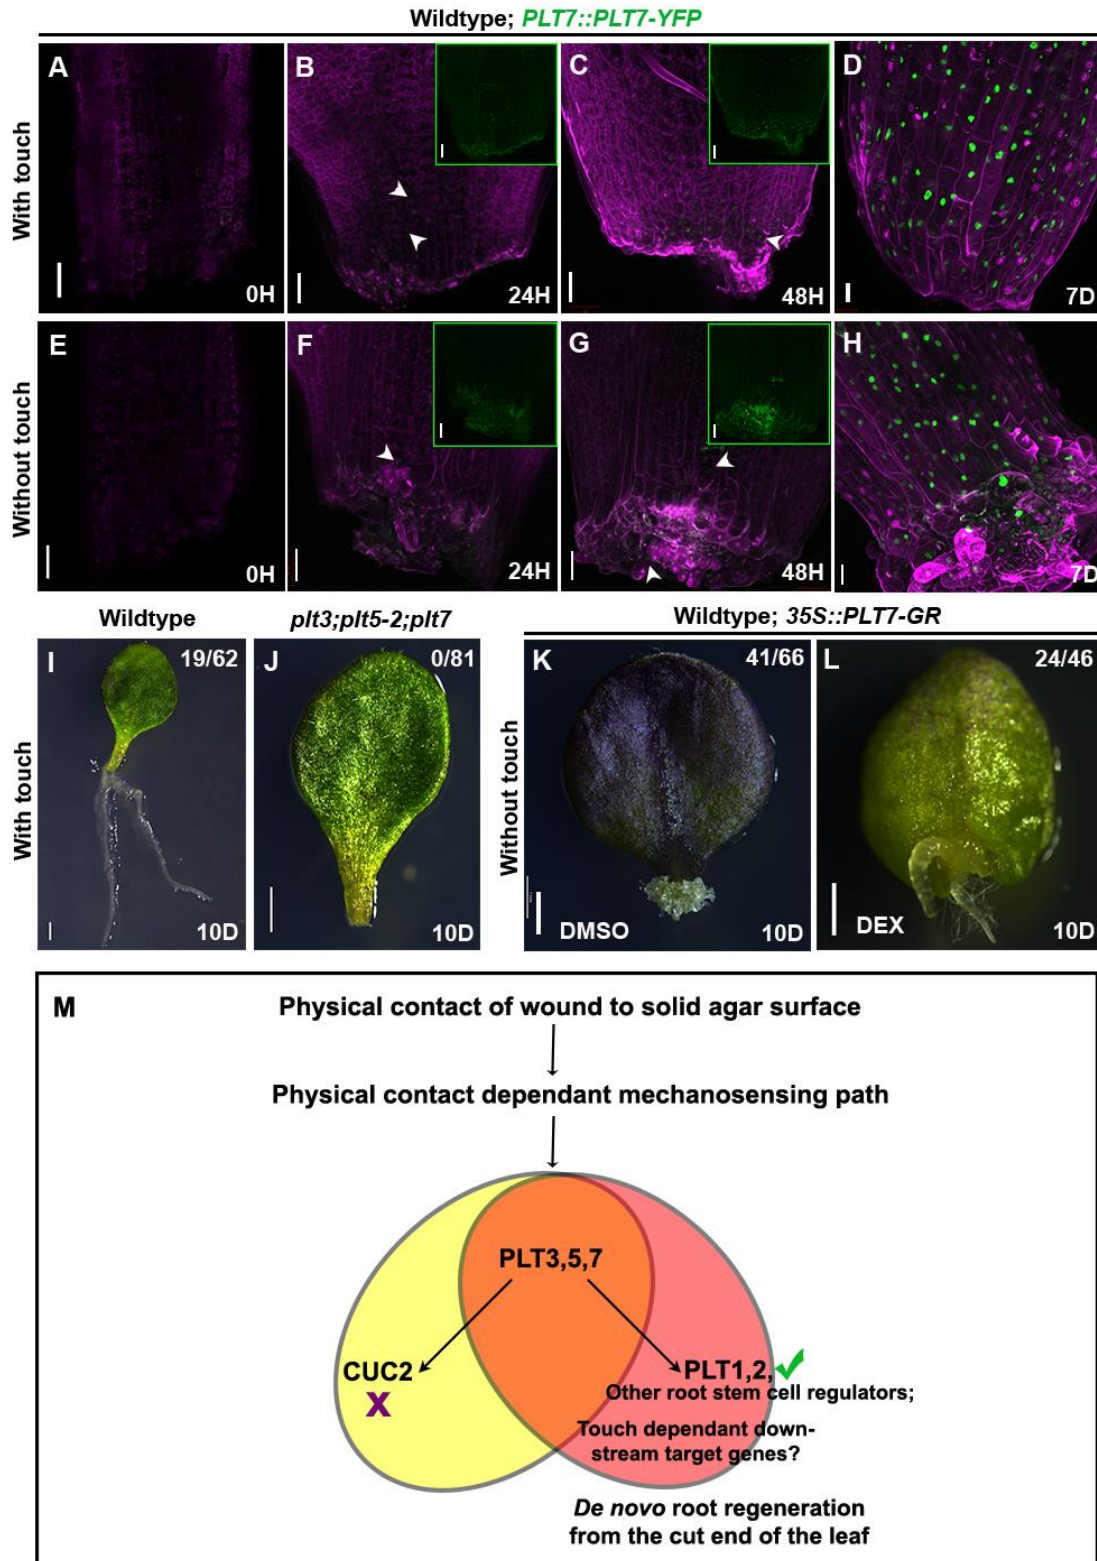

173

174 **Figure 2: PLT3,5,7 are necessary and sufficient for touch mediated *de novo* root**  
 175 **regeneration:** (A-H) *PLT7::PLT7-YFP* expression (green) expression marked by white  
 176 white arrow heads when the cut end is in continuous contact with the MS-Agar medium (A-D) and

177 when the cut end fails to touch the medium (E-H). Insets in B,C,F,G shows the YFP-channel.  
178 (I,J) Wild type (WT) leaf explants exhibit DNRR(I) while *plt3;plt5-2;plt7* mutant(J) shows  
179 neither callus formation nor DNRR even when the cut end touches the MS-Agar medium. (K,  
180 L) Over expression with *35S::PLT7-GR* yields DNRR even when the cut end fails to touches  
181 the MS-Agar medium. (M) Flow-chart illustrating the regulatory module that influence touch  
182 dependant DNRR from cut end of a detached leaf. Scale bars:50µm (A-H), 1mm (I-L).  
183 Magenta colour denotes chlorophyll autofluoresence and propidium iodide. H: hours post cut,  
184 D: days post cut. Brightness and contrast has been adjusted for B,C,F and G insets.

## 185 Reference

---

- 186 Bustillo-Avendaño, E. *et al.* (2018) ‘Regulation of hormonal control, cell reprogramming,  
187 and patterning during de novo root organogenesis’, *Plant physiology*. Am Soc Plant Biol,  
188 176(2), pp. 1709–1727.
- 189 Chen, X. *et al.* (2014) ‘A simple method suitable to study de novo root organogenesis’,  
190 *Frontiers in Plant Science*, 5, p. 208. doi: 10.3389/fpls.2014.00208.
- 191 Du, Y. and Scheres, B. (2017) ‘PLETHORA transcription factors orchestrate de novo organ  
192 patterning during *Arabidopsis* lateral root outgrowth’, *Proceedings of*  
193 *the National Academy of Sciences*. Available at:  
194 <http://www.pnas.org/content/early/2017/10/11/1714410114.abstract>.
- 195 Hoermayer, L. *et al.* (2020) ‘Wounding-induced changes in cellular pressure and localized  
196 auxin signalling spatially coordinate restorative divisions in roots’, *Proceedings of the*  
197 *National Academy of Sciences*. National Acad Sciences, 117(26), pp. 15322–15331.
- 198 Kareem, A. *et al.* (2015) ‘PLETHORA Genes Control Regeneration by a Two-Step  
199 Mechanism’, *Curr Biol*, 25(8), pp. 1017–1030. doi: 10.1016/j.cub.2015.02.022.
- 200 Radhakrishnan, D. *et al.* (2020) ‘A coherent feed-forward loop drives vascular regeneration  
201 in damaged aerial organs of plants growing in a normal developmental context’, *Development*

202 (Cambridge, England). doi: 10.1242/dev.185710.

203 Smith, G. F., Figueiredo, E. and Van Wyk, A. E. (2019) *Kalanchoe (Crassulaceae) in*

204 *Southern Africa: Classification, Biology, and Cultivation*. Academic Press.

205 Xu, L. (2018) 'De novo root regeneration from leaf explants: wounding, auxin, and cell fate

206 transition', *Current Opinion in Plant Biology*. Elsevier Current Trends, 41, pp. 39–45. doi:

207 10.1016/J.PBI.2017.08.004.
